# Supplementary material
Source: publisher site journal article supplement (https://www.dovepress.com/article/337695)

**Supplementary Figure 1.** Association between KIF23 expression and tumor grade in (A) CESC, (B) HNSC, (C) KIRC, (D) LGG, (E) LIHC, (F) OV, (G) PAAD, (H) STAD, (I) UCEC.


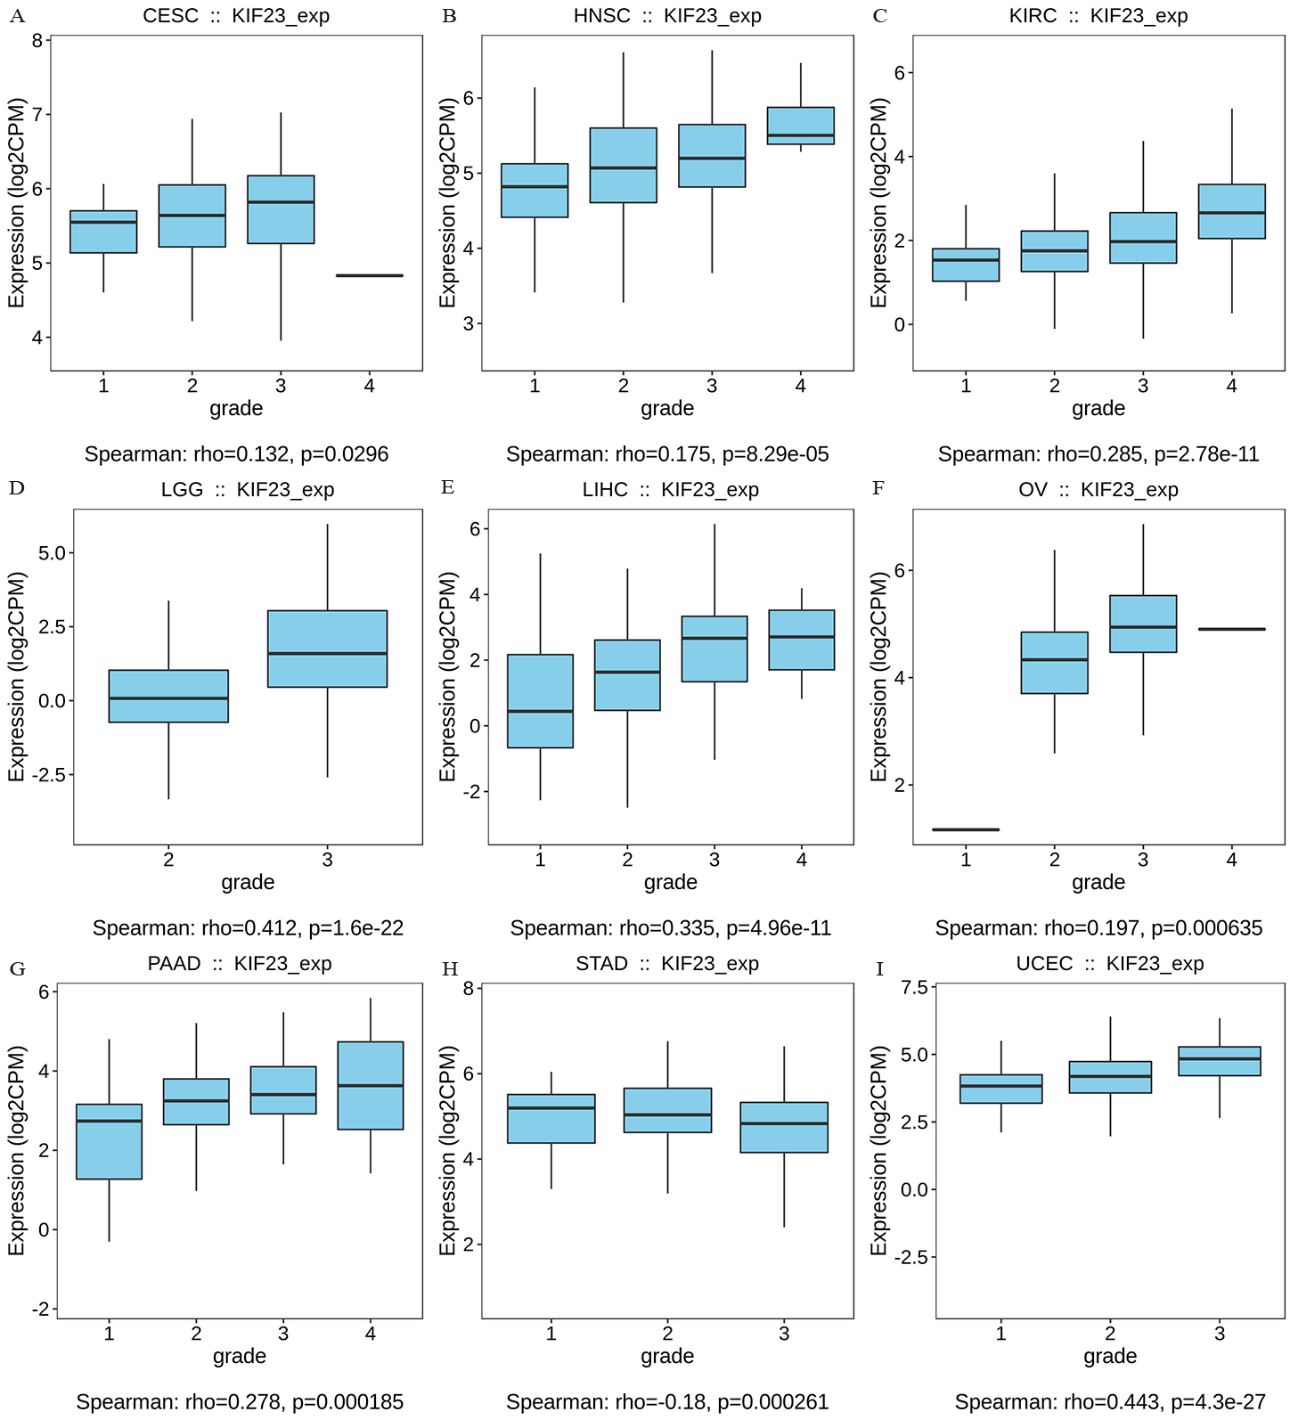


**Supplementary Figure 2.** Correlation between KIF23 expression and tumor stage in (A) ACC, (B) COAD, (C) KIRC, (D) KIRP, (E) LIHC, (F) LUAD, (G) SKCM, (H) UCEC.


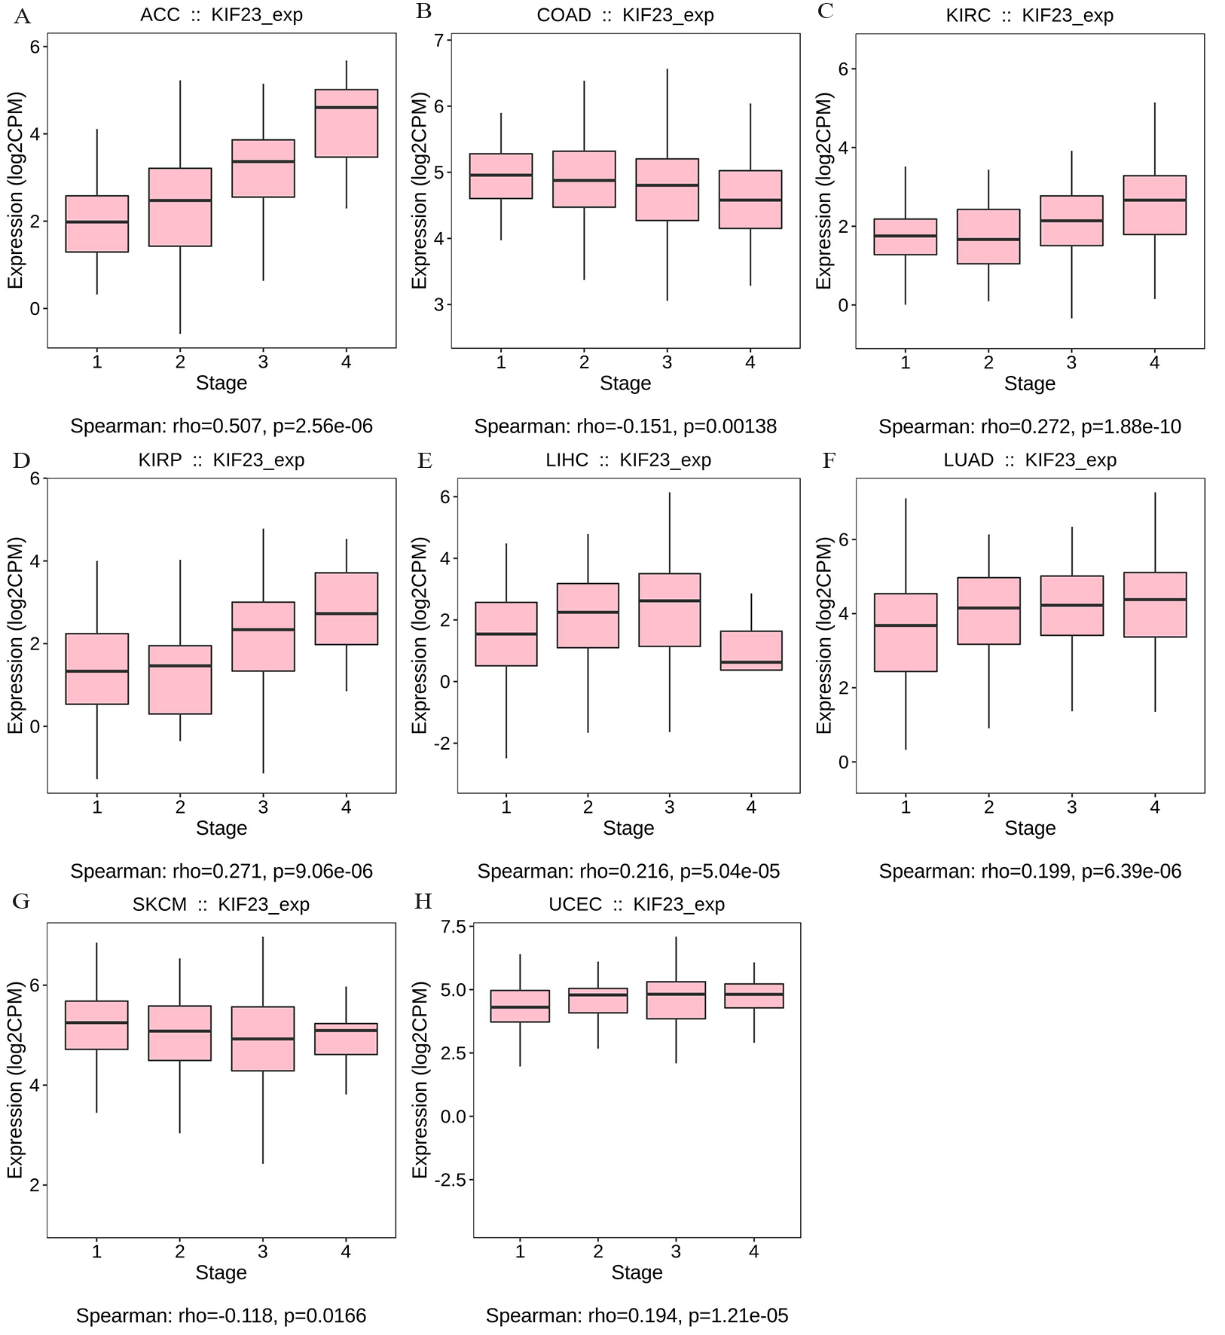


**Supplementary Figure 3.** The relationship between KIF23 expression and immune subtypes in different tumors. (A) in ACC, (B) in BLCA, (C) in BRCA, (D) in COAD, (E) in ESCA, (F) in GBM, (G) in HNSC, (H) in KIRC, (I) in KIRP, (J) in LGG, (K) in LIHC, (L) in LUAD, (M) LUSC, (N) MESO, (O) OV, (P) PAAD, (Q) PRAD, (R) READ, (S) SARC, (T) SKCM, (U)STAD, (V) THCA, (W) UCEC, (X) UVM.


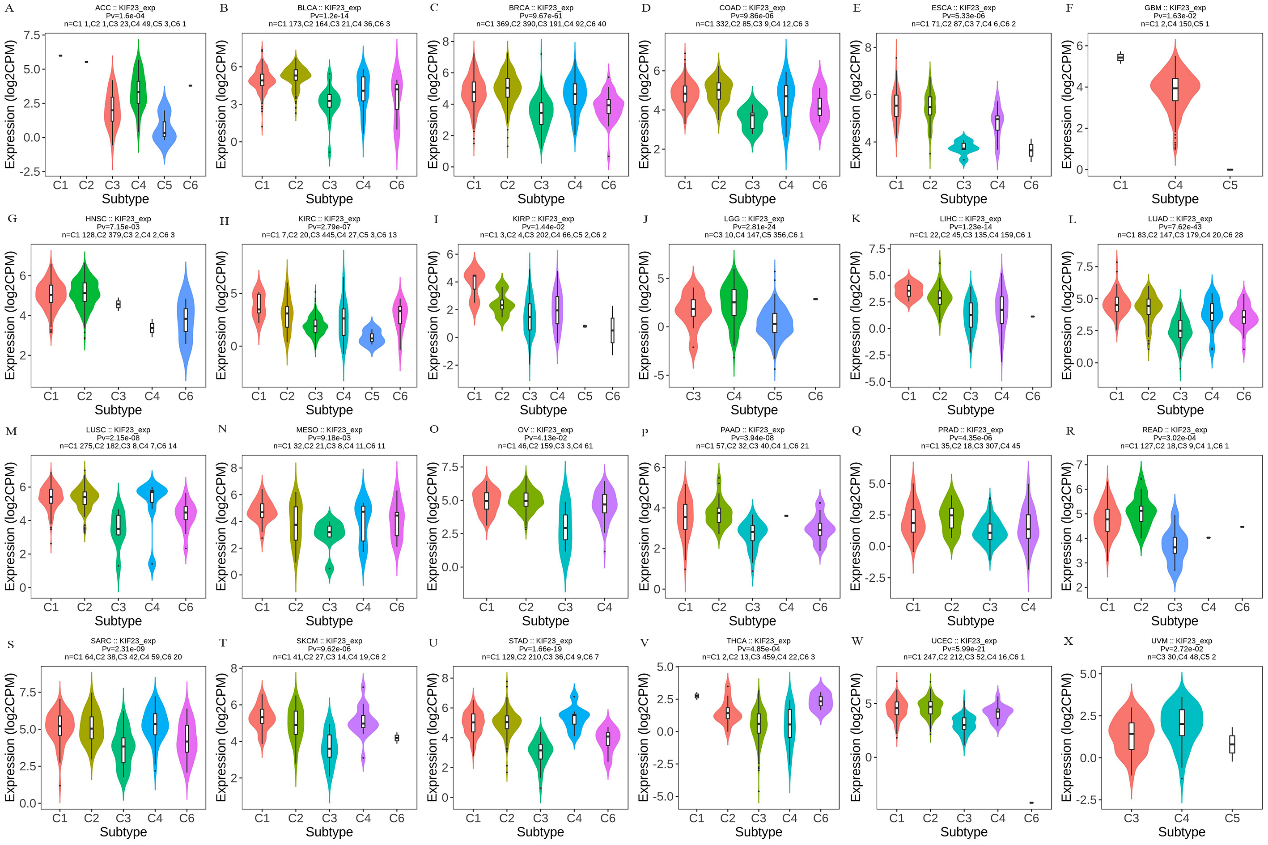


**Supplementary Figure 4.** Association of KIF23 expression with TMB and MSI.


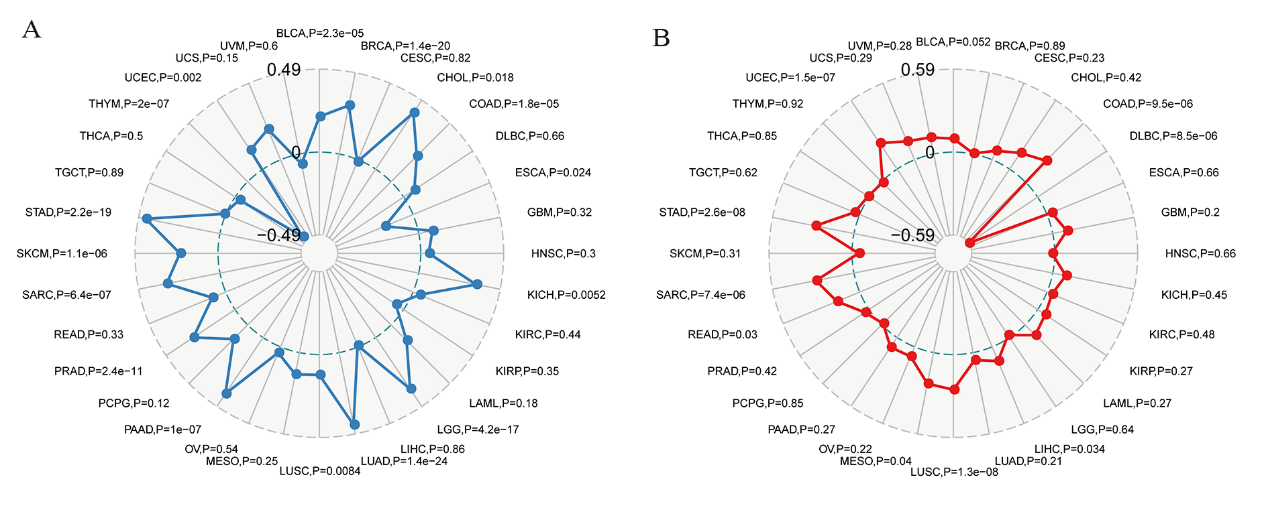


**Supplementary Figure 5.** Correlation of KIF23 expression with estimate score (A), immune score (B), stromal score (C) and immune checkpoints (D)


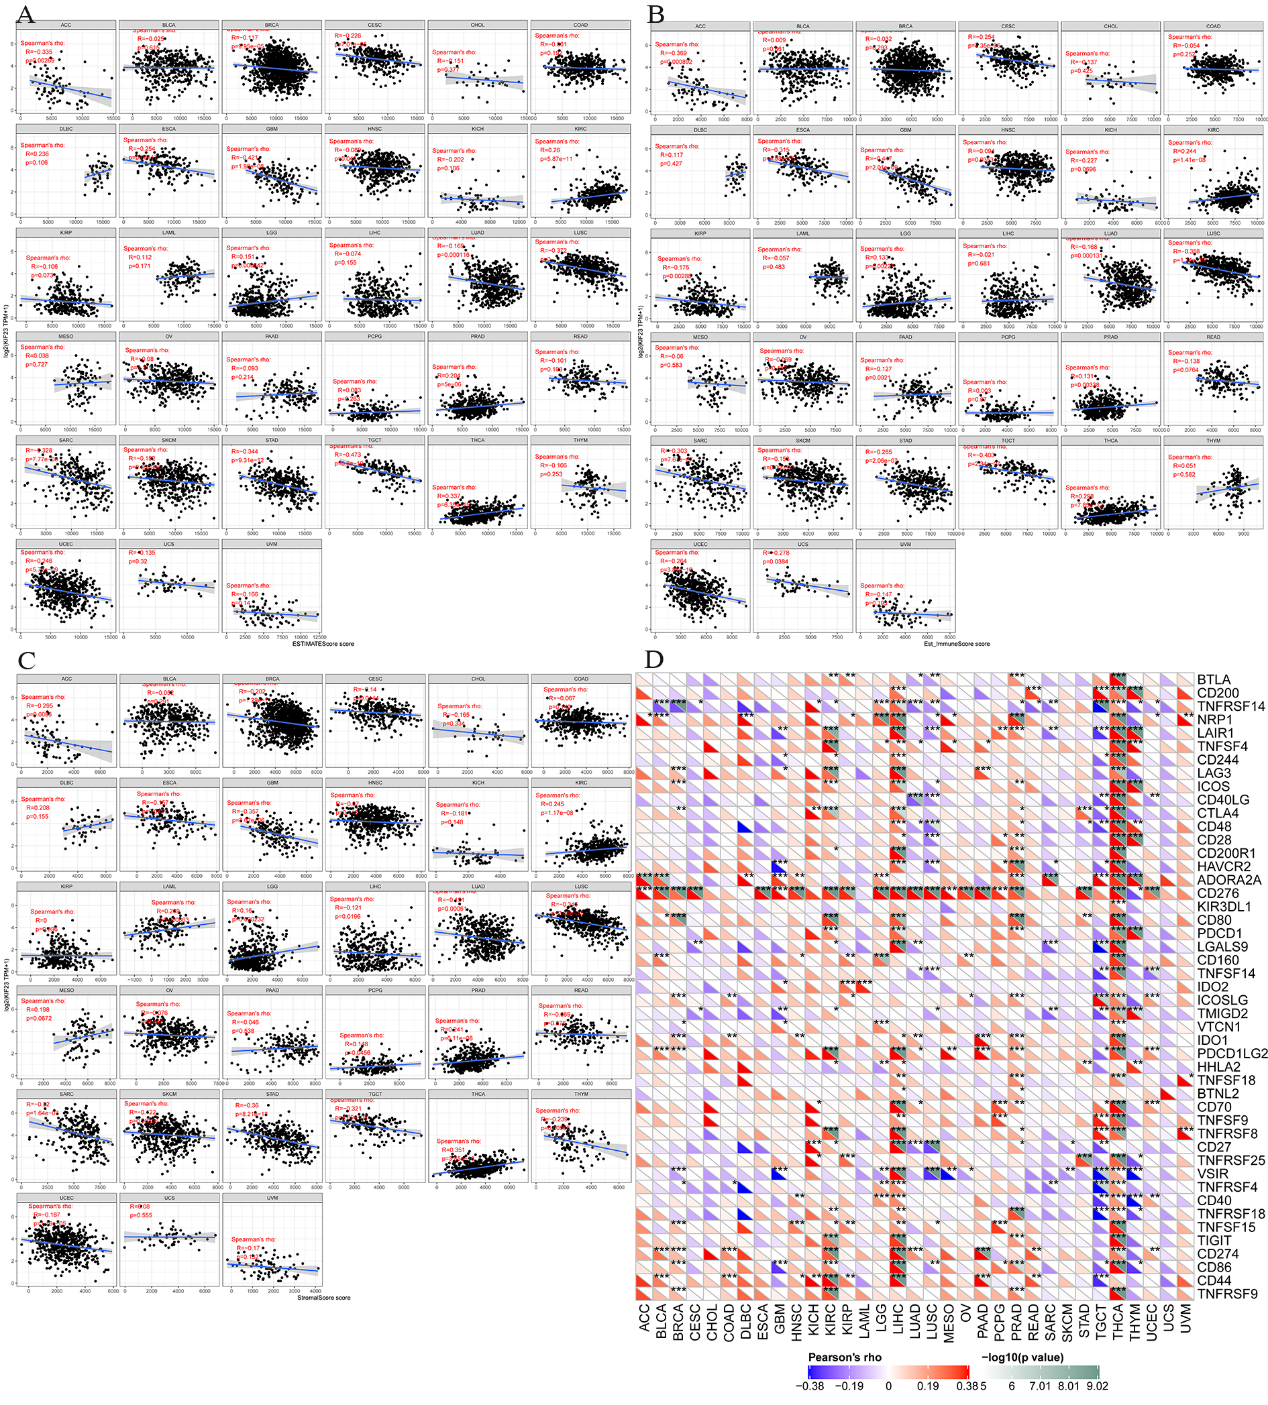

Supplement: Supplementary file 1 [file get_supplementary_file.php]
